# Supplementary material for: Comparative study of the gut microbial community structure of Spodoptera frugiperda and Spodoptera literal (Lepidoptera)
Source: PeerJ journal article supplement (doi:10.7717/peerj.17450), 2024-06-07

- Bacteroides
- Ruminococcaceae.UCG.014
- ZOR0006
- Sphingomonas
- Lactobacillus
- Prevotella.9
- Enterococcus
- Erysipelatoclostridium
- Escherichia
- Enterobacter

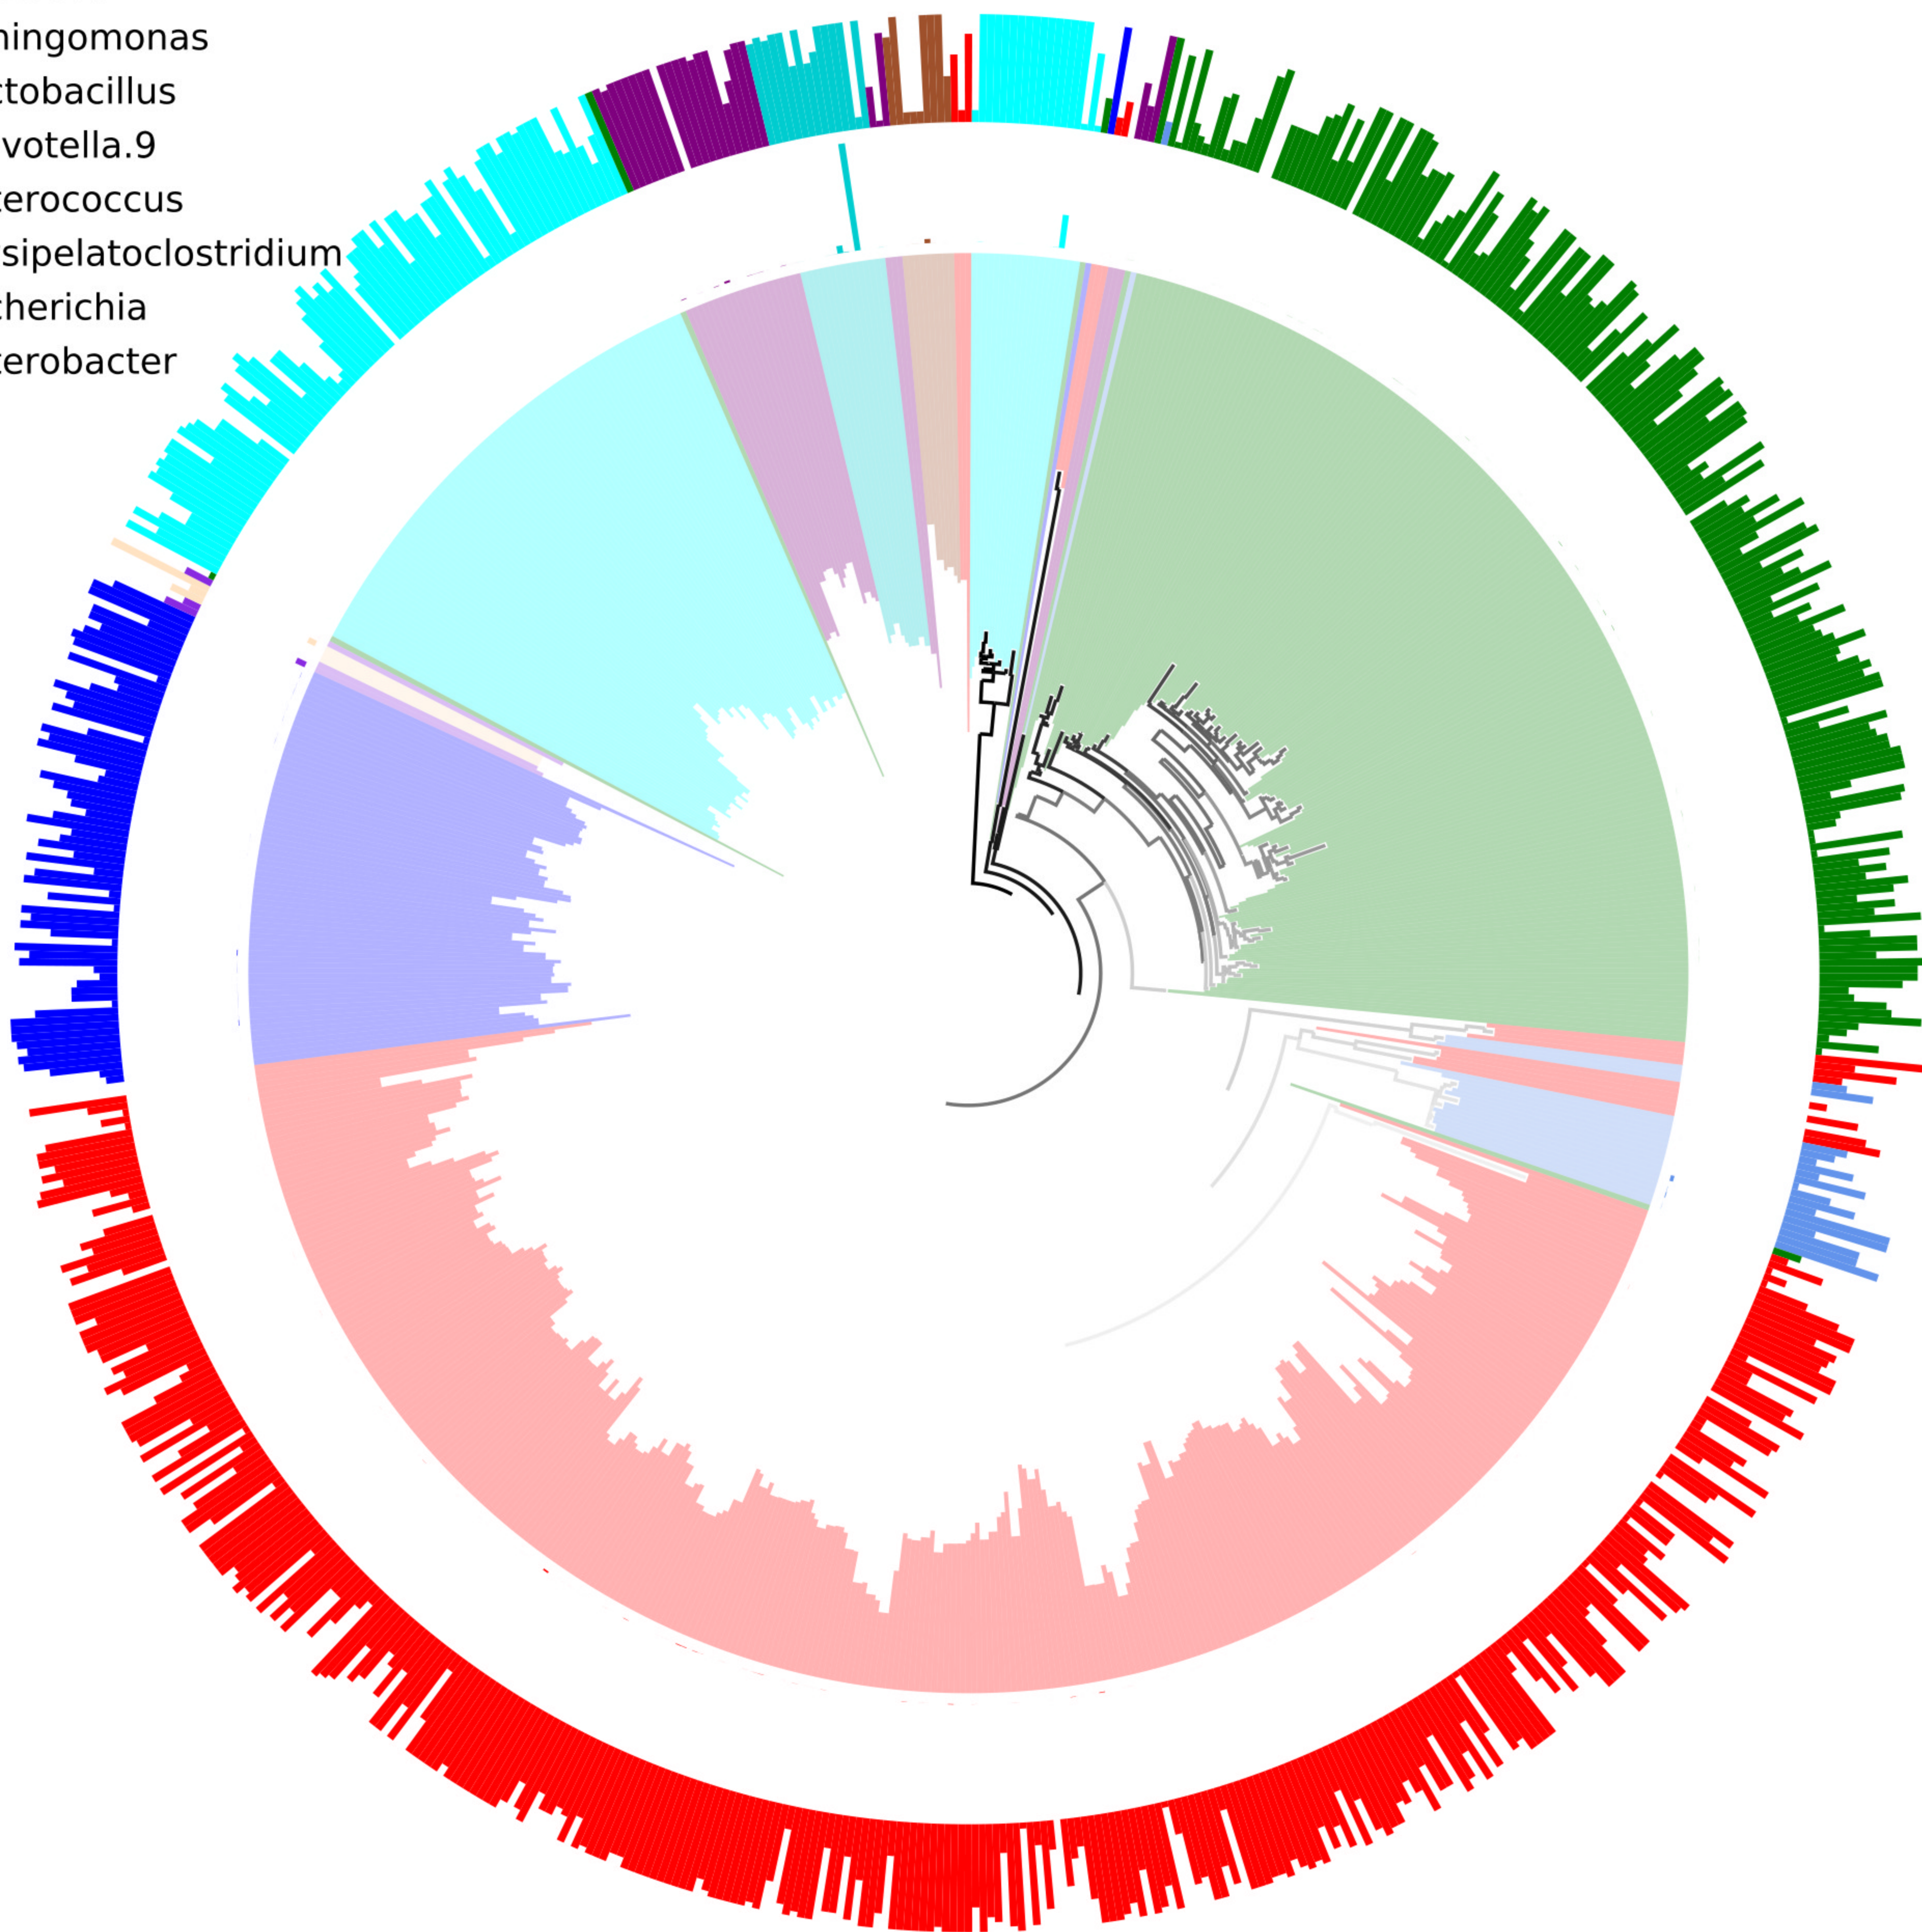

Supplement: FigS1.pdf [file FigS1.pdf]
